# Supplementary figures and images for: An Insight into the Molecular Characteristics and Associated Pathology of Chicken Astroviruses
Source: MDPI journal article supplement (doi:10.3390/v14040722), 2022-03-30

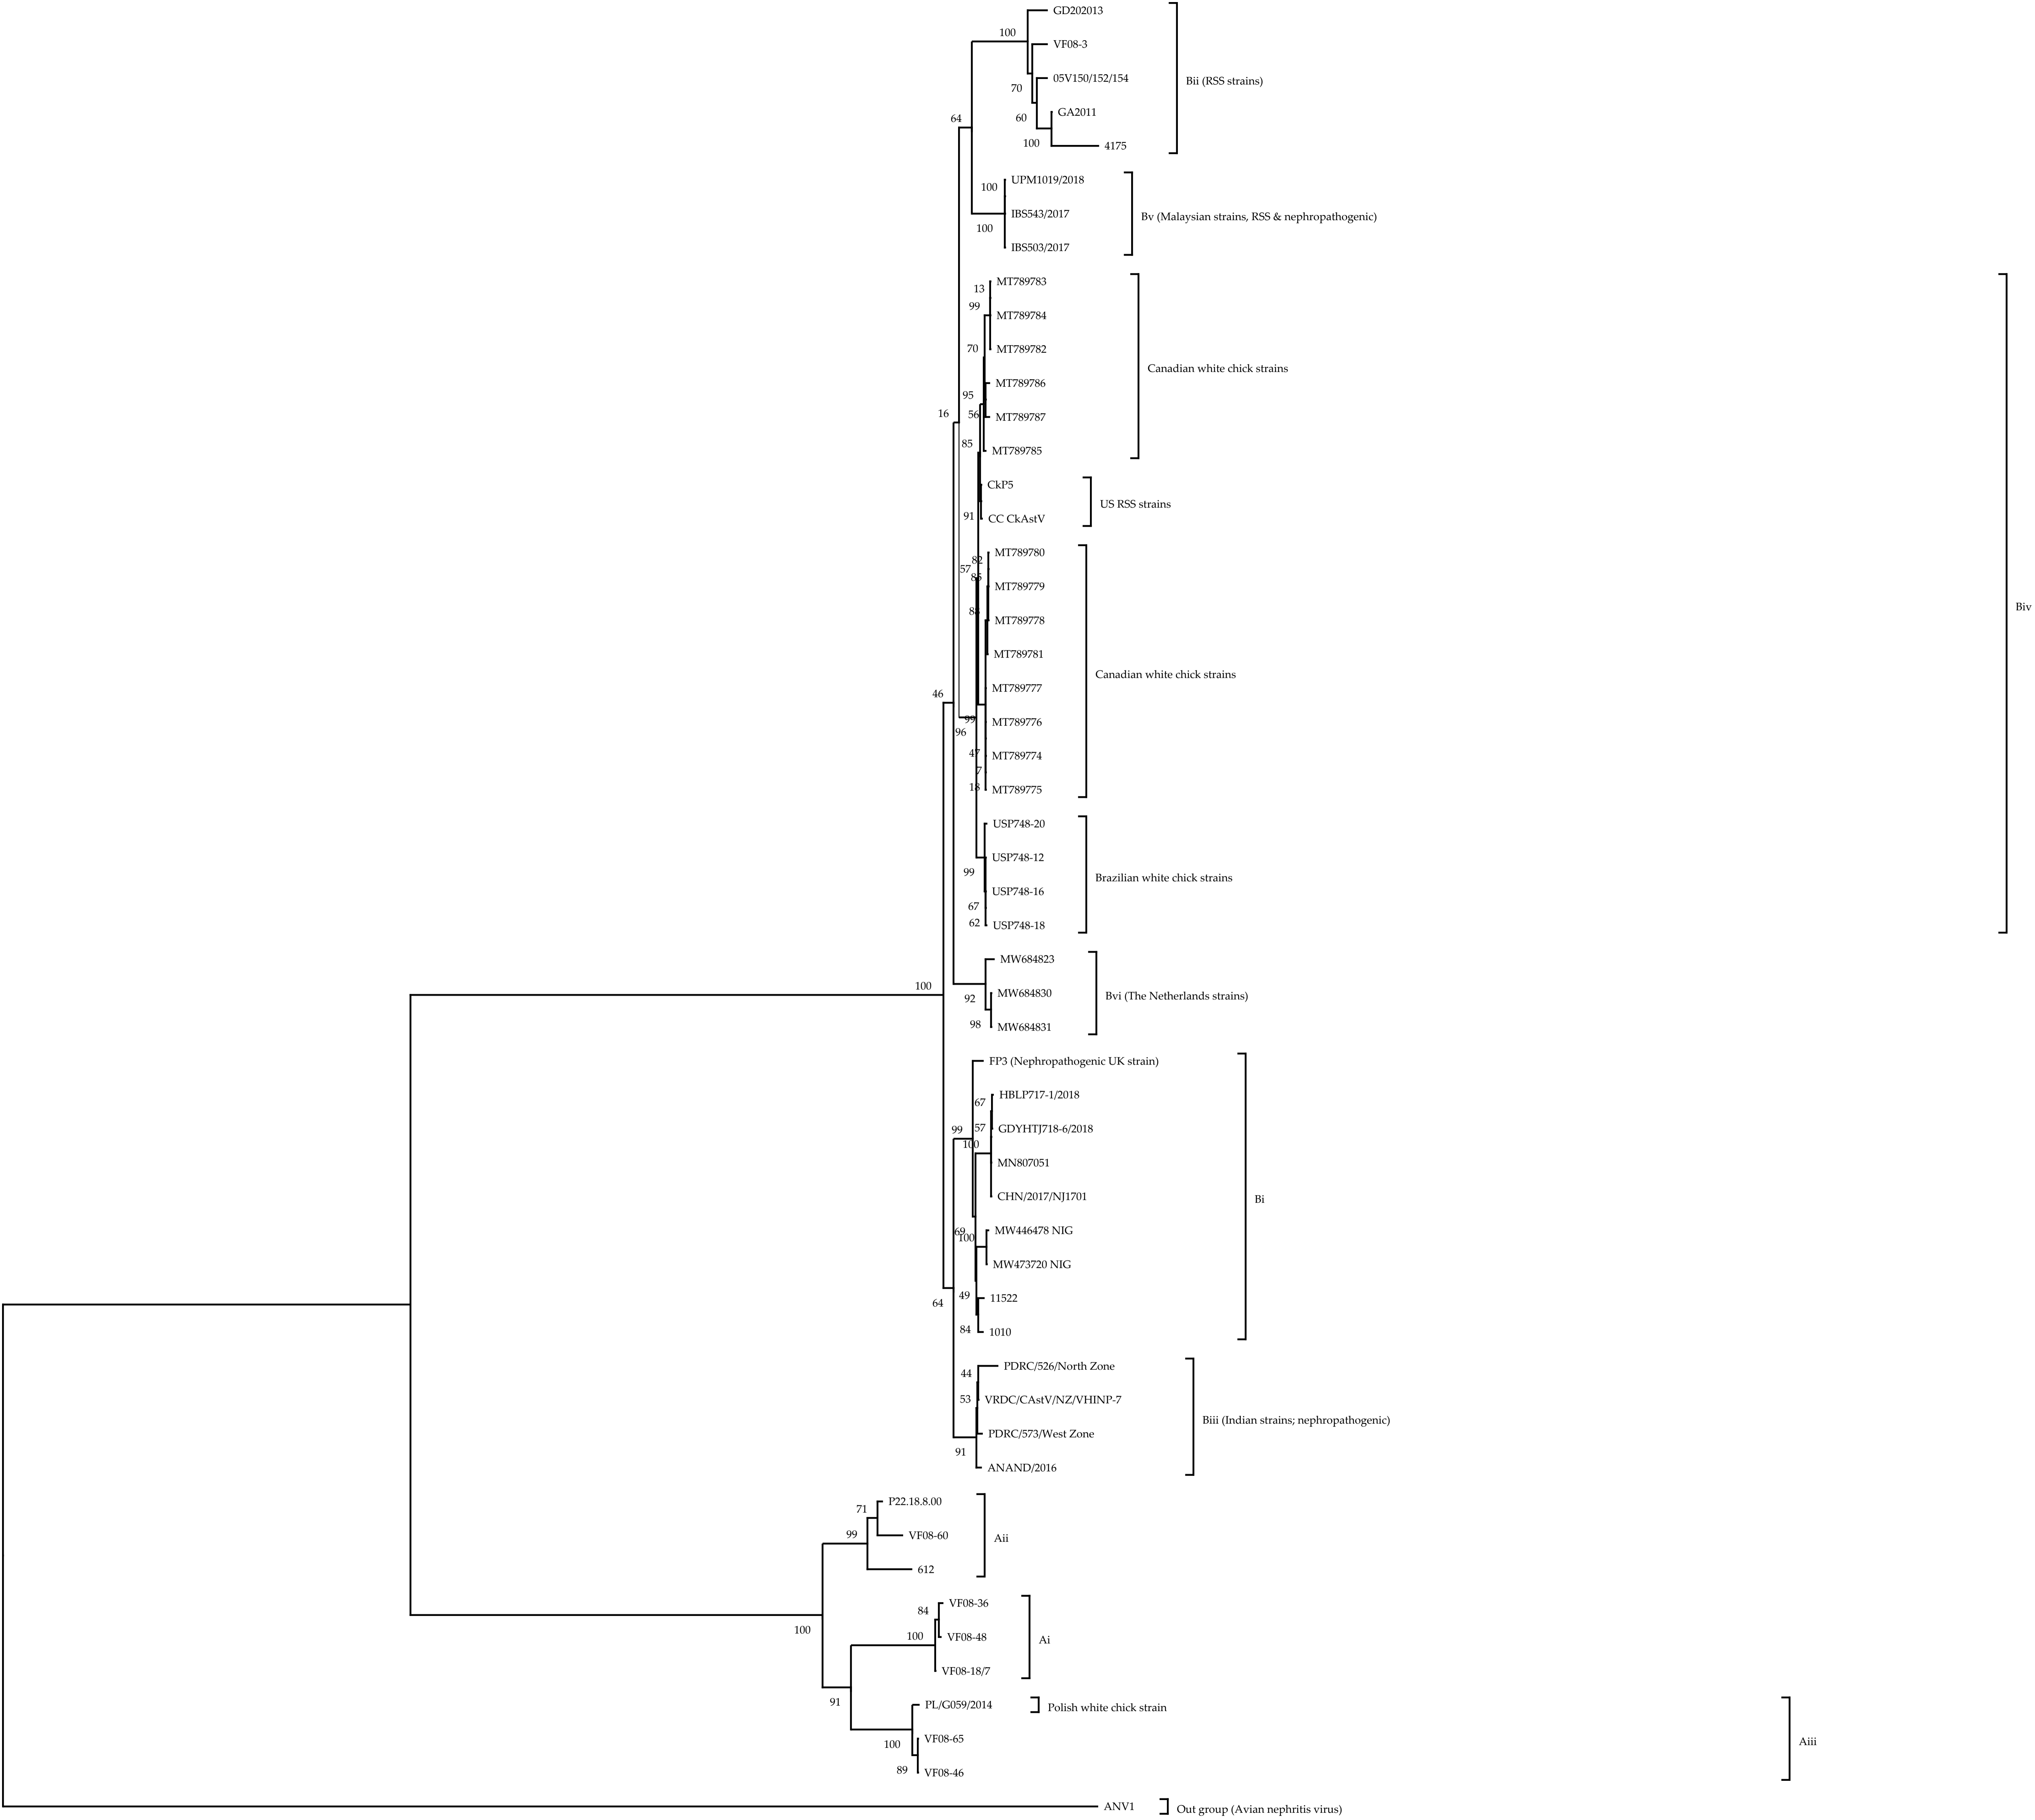

Supplement: s1 [file s1]
